# Supplementary material for: Quenching of bacteriochlorophyll a triplet state by carotenoids in the chlorosome baseplate of green bacterium Chloroflexus aurantiacus
Source: Royal Society of Chemistry journal article supplement (doi:10.1039/d4cp00287c), 2024-01-01
Supplement: d4cp00287c1.pdf [file d4cp00287c1.pdf]

## Supplement

### Quenching of bacteriochlorophyll *a* triplet state by carotenoids in the chlorosome baseplate of green bacterium *Chloroflexus aurantiacus*

Andrei G. Yakovlev\*<sup>a</sup> and Alexandra S. Taisova<sup>a</sup>

<sup>a</sup>Lomonosov Moscow State University, Belozersky Institute of Physico-Chemical Biology, Leninskie Gory, 119991, Moscow, Russian Federation, \* e-mail: yakov@belozersky.msu.ru

The population dynamics of states can be approximately described by the following system of kinetic equations:

$$\begin{aligned}dN_1/dt &= \sigma N'_{0B} J(t) - (K_{01} + K_1)N_1 \\dN_2/dt &= K_1 N_1 - K_2 N_2 \\dN_3/dt &= K_2 N_2 \\dN_{0B}/dt &= -\sigma N'_{0B} J(t) + K_{01} N_1 + K_2 N_2 \\dN_{0C}/dt &= -dN_3/dt\end{aligned}\tag{1}$$

Here  $N_1$ ,  $N_2$  and  $N_3$  are the population densities of the BChl  $a^*$ , BChl  $a^T$  and Car<sup>T</sup> states, respectively;  $K_1$  and  $K_2$  are the rates of the BChl  $a^* \rightarrow$  BChl  $a^T$  and BChl  $a^T \rightarrow$  Car<sup>T</sup> processes, respectively;  $K_{01}$  – rate of spontaneous decay of the BChl  $a^*$ ;  $N_{0B}$  and  $N_{0C}$  are the population densities of the BChl  $a$  and Car ground states, respectively;  $N'_{0B}$  is the population density of BChl  $a$  in the absence of excitation;  $\sigma$  is the absorption cross section of BChl  $a$  at the excitation wavelength;  $J(t) \sim \text{sech}^2(t/\tau)$  is the time course of the excitation energy density.

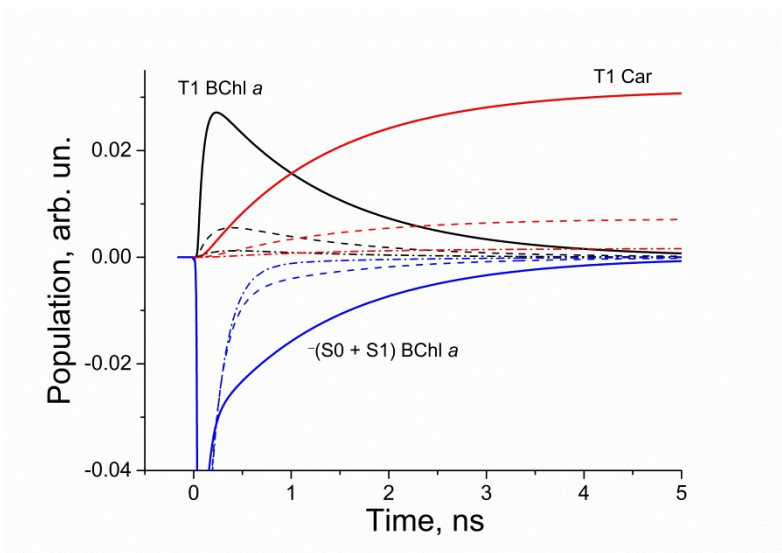

Fig. S1. Simulation of the populations of the states  $T_1$  BChl  $a$  (black),  $T_1$  Car (red) and the sum  $-(S_0 \text{ BChl } a + S_1 \text{ BChl } a)$  (blue) at  $K_1 = 0.1$  (solid line), 1 (dash) and 5 ns (dash-dot).  $K_{01} = 0.17$  ns,  $K_2 = 1.3$  ns,  $\tau = 0.01$  ns.

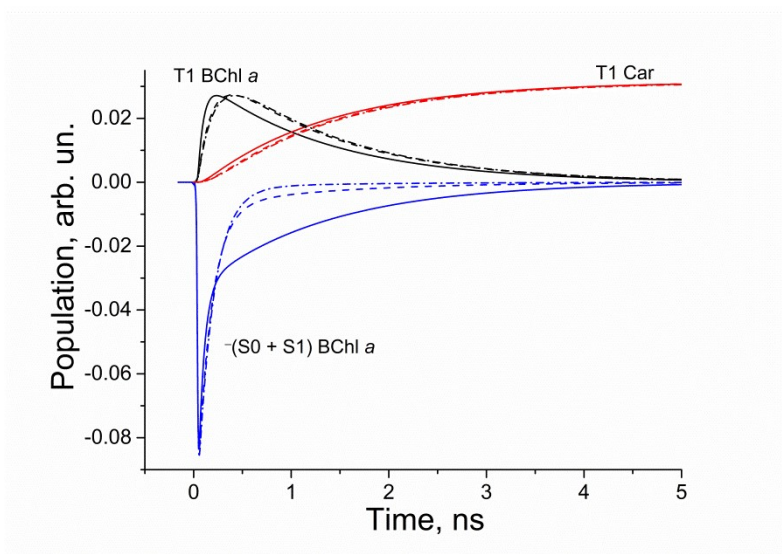

Fig. S2. Same as in Fig. S1, but with population normalization.

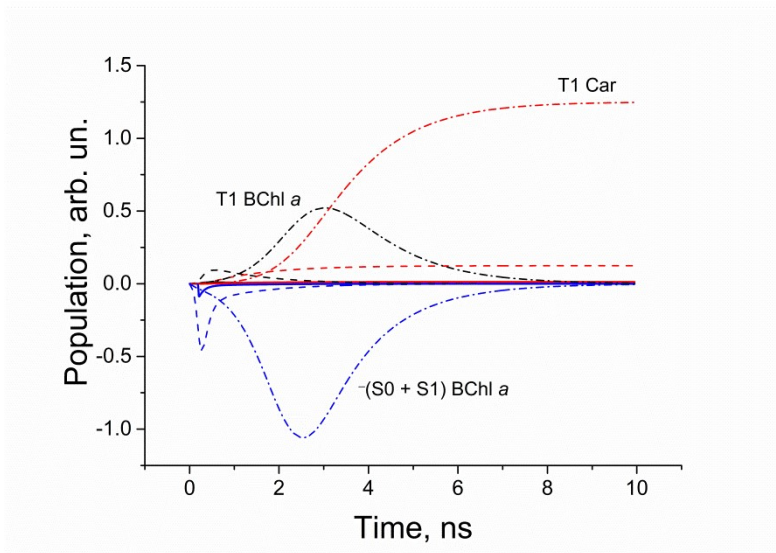

Fig. S3. Simulation of the populations of the states  $T_1$  BChl  $a$  (black),  $T_1$  Car (red) and the sum  $-(S_0$  BChl  $a + S_1$  BChl  $a)$  (blue) at  $\tau = 0.01$  (solid line), 0.1 (dash) and 1 ns (dash-dot).  $K_{01} = 0.17$  ns,  $K_2 = 1.3$  ns,  $K_1 = 0.5$  ns.

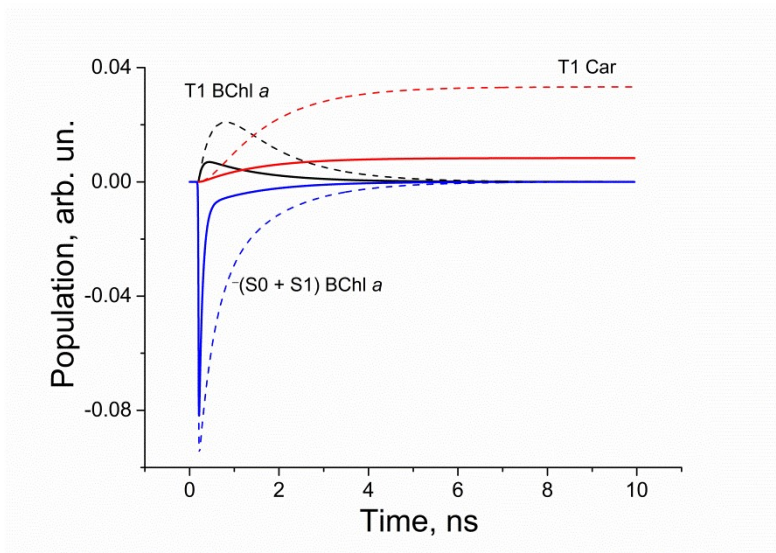

Fig. S4. Simulation of the populations of the states  $T_1$  BChl  $a$  (black),  $T_1$  Car (red) and the sum  $-(S_0$  BChl  $a + S_1$  BChl  $a)$  (blue) at  $K_{01} = 0.1$  (solid line) and 1 ns (dash).  $K_1 = 0.5$  ns,  $K_2 = 1.3$  ns,  $\tau = 0.01$  ns.

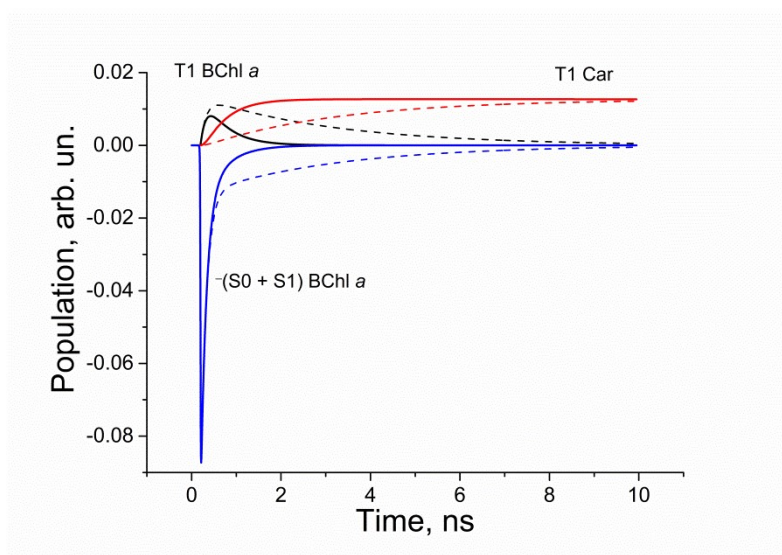

Fig. S5. Simulation of the populations of the states  $T_1$  BChl  $a$  (black),  $T_1$  Car (red) and the sum  $-(S_0$  BChl  $a + S_1$  BChl  $a)$  (blue) at  $K_2 = 0.5$  (solid line) and 3 ns (dash).  $K_{01} = 0.17$  ns,  $K_1 = 0.5$  ns,  $\tau = 0.01$  ns.
